# Supplementary material for: Equivalent circuit modeling on defect-dipole enhanced dielectric permittivity
Source: Royal Society of Chemistry journal article supplement (doi:10.1039/d0tc03308a), 2020-01-01
Supplement: d0tc03308a1.pdf [file d0tc03308a1.pdf]

## Supporting information

### Equivalent Circuit Modeling on the Defect-dipole Enhanced Dielectric Permittivity

*Jian Wang<sup>a,b</sup>, Dandan Gao<sup>a</sup>, Huan Liu<sup>a</sup>, Jiyang Xie<sup>a</sup>, Wanbiao Hu<sup>a,b\*</sup>*

*<sup>a</sup> Key Laboratory of LCR Materials and Devices of Yunnan Province, International Joint Research Center for Optoelectronic and Energy Materials, School of Materials and Energy, Yunnan University, Kunming 650091, P. R. China*

*<sup>b</sup> School of Physics and Astronomy, Yunnan University, Kunming 650091, P. R. China*

*\* Corresponding authors: Wanbiao Hu (huwanbiao@ynu.edu.cn)*

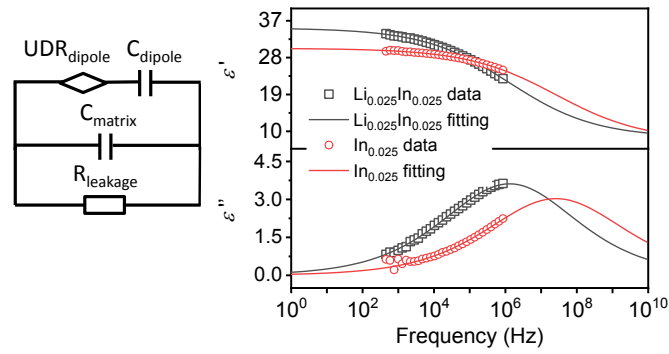

**Figure S1** Frequency dependent  $\epsilon'$  and  $\epsilon''$  curves at room temperature. The open symbols are experimental data and the solid lines are fitted curves with the proposed equivalent circuit (ii). The results reveal the lower characteristic frequency in  $\text{Li}_{0.025}\text{In}_{0.025}\text{Mg}_{0.95}\text{O}$  than in  $\text{In}_{0.025}\text{Mg}_{0.975}\text{O}$ . Consequently, the measured dielectric loss of  $\text{Li}_{0.025}\text{In}_{0.025}\text{Mg}_{0.95}\text{O}$  is higher than that of  $\text{In}_{0.025}\text{Mg}_{0.975}\text{O}$ .
